# Supplementary material
Source: PubMed Central journal article supplement (PMC10247468)
Supplement: NIHMS1892276-supplement-1.pdf [file NIHMS1892276-supplement-1.pdf]

## Supplementary Information

### Figures

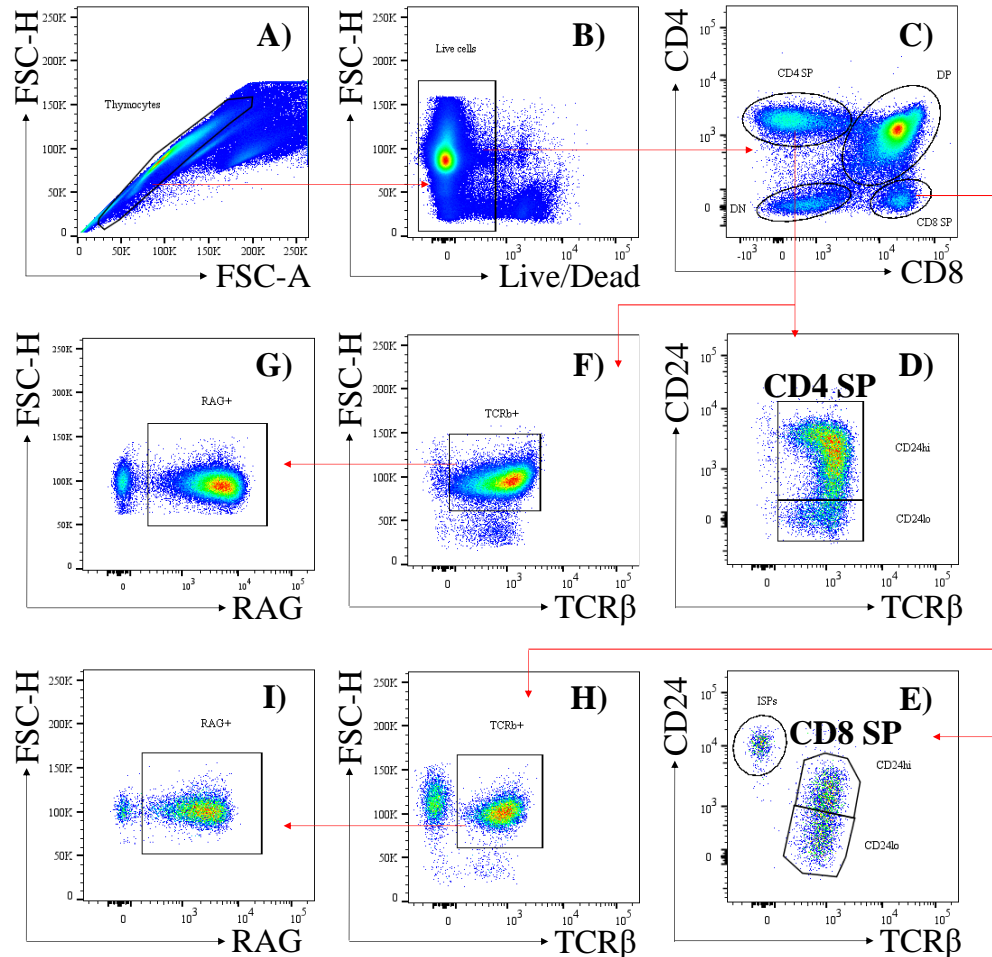

**Figure S1: Gating strategy for quantification of thymocyte subsets, DN, DP and SPs subsets, CD24<sup>hi</sup> and CD24<sup>lo</sup> SP subsets, proportions of TCRβ<sup>+</sup>RAG<sup>+</sup> SPs and RAG MFI in TCRβ<sup>+</sup>SPs.** In naïve and 8-10 weeks post reconstituted mice, the thymocytes were harvested, and were analyzed by FACS. **A)** The singlets and **B)** live events were gated to generate CD4 versus CD8 plots, wherein the DN (CD4<sup>-</sup>CD8<sup>-</sup>), DP (CD4<sup>+</sup>CD8<sup>+</sup>), CD4 SP (CD4<sup>+</sup>CD8<sup>-</sup>) and CD8 SP (CD4<sup>-</sup>CD8<sup>+</sup>) cells were gated for quantification (**C**). The CD4 and CD8 SPs were gated on the basis of CD24 and TCRβ expression to analyze the CD24<sup>hi</sup> and CD24<sup>lo</sup> SP subsets (**D** and **E**). In the reconstituted mice, after gating on the CD45.1/2 (+/+ BM-derived) and the CD45.2 (+/w BM-derived) thymocytes, the DN, DP and SP thymocytes were quantified along with the CD24<sup>hi</sup> and CD24<sup>lo</sup> SP subsets. In addition, (**F** and **G**) the TCRβ<sup>+</sup> CD4 SPs and (**H** and **I**) the TCRβ<sup>+</sup> CD8 SP cells were gated to quantify the proportions of RAG<sup>+</sup> cells and the RAG-GFP geometric MFI in the respective gates.

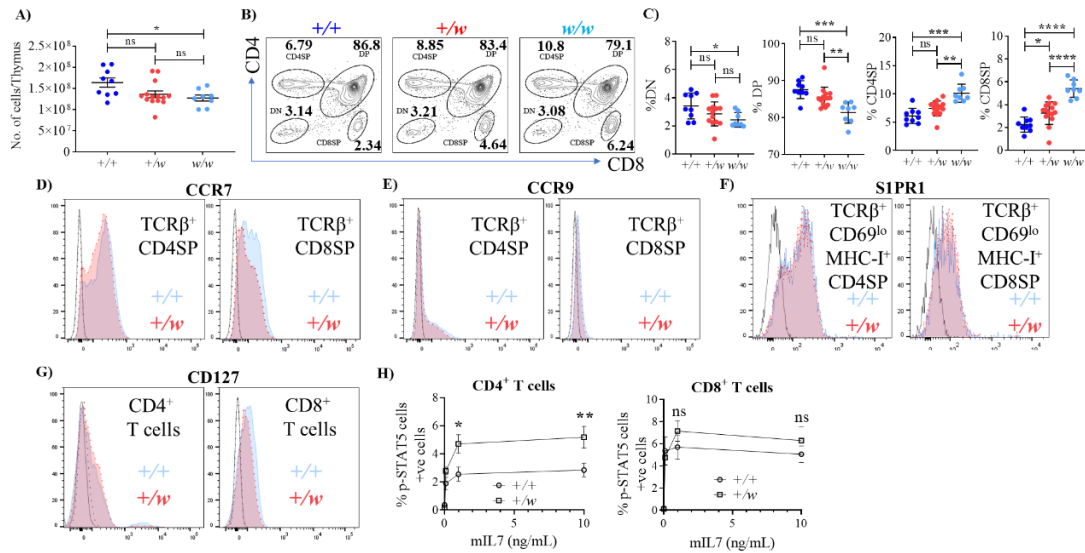

**Figure S2: The WHIM allele skews the distribution of thymocyte subpopulations with increased proportions of CD8 SP cells.** Thymi from 5-8 week old mice were harvested. **A)** Total thymic cellularity. **(B and C)** Thymocyte subset analysis by CD4 and CD8 expression. **B)** Representative example using thymocytes from +/+, +/w and w/w mice as indicated above each contour-plot. Subset names and frequencies are adjacent to the gates. +, wild type allele; w, WHIM allele; DN; DP and CD4SP and CD8SP. **C)** Summary data for thymocyte subset distribution. In **A** and **C**, mouse *Cxcr4* genotypes (+, wild type allele; w, WHIM allele) are indicated on the x-axes. Summary data are the mean  $\pm$  SEM of at least 7 mice per genotype from 4 independent experiments. ns, not significant; \*,  $p < 0.05$ , \*\*,  $p < 0.01$ , \*\*\*,  $p < 0.001$  and \*\*\*\*,  $p < 0.0001$  as determined by the one-way ANOVA for **A** and **C**. **(D-F)** CCR7, CCR9 and S1PR1 expression on thymocytes. Representative histograms of **D)** CCR7 and **E)** CCR9 cell-surface expression on TCR $\beta^+$ CD4SP and TCR $\beta^+$ CD8SP WT (blue) and WHIM (red) thymocytes are overlaid on WT (solid line) and WHIM (dashed line) isotype controls. **(F)** S1PR1 expression on mature (TCR $\beta^+$ CD69<sup>lo</sup>MHC-I<sup>+</sup>) WT (blue) and WHIM (red) thymocytes are shown as histograms (fluorescence minus one as control). **(G)** Representative histograms of CD127 (IL7R $\alpha$ ) expression on bone marrow T cells. The CD4<sup>+</sup> T cells and CD8<sup>+</sup> T cells were gated to analyze the cell-surface expression of CD127. Representative histograms are shown with fluorescence minus one as control, WT (blue) and WHIM (red). **(H)** p-STAT5 expression in recombinant mouse IL7 activated T cells. WT and WHIM bone marrow cells were stimulated with the indicated doses of IL7 (Catalog #: 407-ML-005/CF, R&D Systems<sup>®</sup>) for 20 mins at 37°C and percentage T cells expressing intracellular p-STAT5 were quantified. The data is depicted as mean  $\pm$  SEM. The results in panels **D-G** are representative of 4-5 mice per genotype from a single experiment. The results in panels **H** are from a single experiment with each condition tested in replicates from 4-5 mice per genotype. \*,  $p < 0.05$  and \*\*,  $p < 0.01$ , as determined by two-way ANOVA for the +/+ vs +/w comparison in panel **H**.

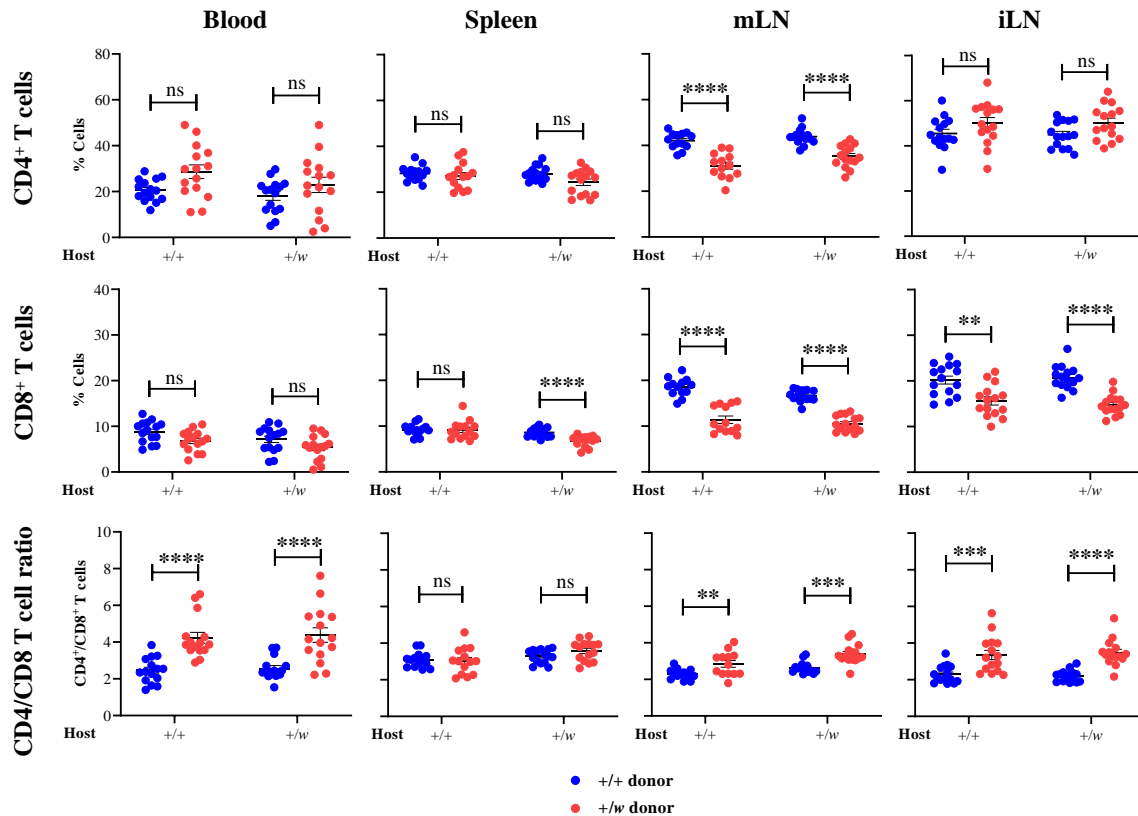

**Fig. S3. The WHIM mutation does not promote CD8<sup>+</sup> T cell accumulation in the blood, spleen and lymph nodes.** At approximately 6 weeks of age, male and female CD45.1/2 +/+ and CD45.2 +/w mice expressing RAG-GFP were sacrificed, and their BM cells were harvested. After T cell depletion, the +/+ and +/w BM cells were mixed in a ratio of 1:1 and i.v. injected into lethally irradiated CD45.1/2 +/+ and +/w mice (not expressing RAG-GFP). After 8-10 weeks of BM reconstitution, the samples indicated on the top of the first row of panels were harvested and stained for cell-surface CD45.1, CD45.2, CD4 and CD8 to quantify CD4<sup>+</sup> and CD8<sup>+</sup> T cells and CD4/CD8 ratios in each tissue, as designated on the left of each graph row. The +/w BM-derived CD45<sup>+</sup> leukocyte chimerism was approximately 8.5%, 21%, 23% and 17% in blood, spleen, mLN and iLN, respectively. The *Cxcr4* genotypes (+, wild type allele; w, WHIM allele) of the recipient mice are given on the x-axes of the panels and the *Cxcr4* genotype color code for the donor-derived leukocytes is given at the bottom of the figure. Data are summarized as the mean  $\pm$  SEM of 13-16 mice per genotype from 7 independent experiments. ns: not significant, \*\*,  $p < 0.01$ , \*\*\*,  $p < 0.001$  and \*\*\*\*,  $p < 0.0001$ , as determined by the multiple t-tests.

**Table S1: List of antibodies used for flow cytometry.**

| <b>Antigen Specificity</b> | <b>Clone</b> | <b>Vendor</b>          | <b>Catalog no.</b> | <b>Dilution</b> | <b>Conjugate</b> |
|----------------------------|--------------|------------------------|--------------------|-----------------|------------------|
| CD3 $\epsilon$             | 145-2C11     | BioLegend®             | 100312             | 1:25            | APC              |
| CD3 $\epsilon$             | 145-2C11     | BioLegend®             | 100351             | 1:25            | BV605™           |
| CD3                        | SK7          | BD Biosciences         | 341091             | 1:100           | PE/Cy7           |
| CD3                        | 7D6          | Invitrogen             | MHCD0301-4         | 1:20            | FITC             |
| CD4                        | RPA-T4       | Invitrogen             | 17-0049-42         | 1:100           | APC              |
| CD4                        | S3.5         | Invitrogen             | MHCD0431           | 1:100           | PerCP            |
| CD4                        | RM4-5        | BioLegend®             | 100516             | 1:100           | APC              |
| CD8                        | RPA-T8       | BD Biosciences         | 565165             | 1:100           | APC-R700         |
| CD8                        | 3B5          | Invitrogen             | MHCD0831           | 1:20            | PerCP            |
| CD8a                       | 53-6.7       | eBioscience™           | 48-0081-82         | 1:200           | eFluor™ 450      |
| CD8a                       | 53-6.7       | BioLegend®             | 100708             | 1:100           | PE               |
| CD8a                       | 53-6.7       | BD Biosciences         | 563332             | 1:50            | BUV786           |
| CD24                       | M1/69        | BioLegend®             | 101827             | 1:200           | BV605™           |
| CD44                       | IM7          | BioLegend®             | 103032             | 1:100           | PerCP/Cyanine5.5 |
| CD45                       | 30-F11       | BioLegend®             | 103126             | 1:25            | Pacific Blue™    |
| CD45                       | 30-F11       | BioLegend®             | 103106             | 1:100           | PE               |
| CD45                       | HI30         | Invitrogen             | 47-0459-42         | 1:100           | APC-eFluor™ 780  |
| CD45.1                     | A20          | eBioscience™           | 25-0453-82         | 1:50            | PE/Cy7           |
| CD45.2                     | 104          | eBioscience™           | 48-0454-82         | 1:25            | eFluor® 450      |
| CD127                      | 15-1271-82   | eBioscience™           | A7R34              | 1:200           | PE/Cy5           |
| IFN- $\gamma$              | 505813       | BioLegend®             | XMG1.2             | 1:200           | AlexaFluor® 488  |
| IL-2                       | 503808       | BioLegend®             | JES6-5H4           | 1:200           | PE               |
| Granzyme B                 | GB11         | BioLegend®             | 515403             | 1:100           | FITC             |
| KLRG1                      | 2F1/KLRG1    | BioLegend®             | 138416             | 1:200           | PE/Cy7           |
| TCR $\beta$                | H57-597      | BioLegend®             | 109220             | 1:50            | APC/Cy7          |
| TNF- $\alpha$              | MP6-XT22     | BioLegend®             | 506324             | 1:100           | PE/Cyanine7      |
| CCR7                       | 4B12         | BioLegend®             | 120105             | 1:10            | PE               |
| CCR9                       | 9B1          | BioLegend®             | 129707             | 1:20            | PE               |
| CXCR4                      | 2B11         | eBioscience™           | 61-9991-82         | 1:50            | PE-eFluor®610    |
| CXCR4                      | L276F12      | BioLegend®             | 146505             | 1:50            | PE               |
| S1PR1 (S1P1)               | 713412       | R&D Systems            | MAB7089            | 1:12.5          | Unconjugated     |
| Rat IgG                    | Polyclonal   | Jackson ImmunoResearch | 712-136-153        | 1:200           | APC              |
| Phospho-STAT5              | SRBCZX       | Invitrogen             | 12-9010-42         | 1:20            | PE               |
| Isotype control            | MOPC-21      | BioLegend®             | 400114             | 1:80            | PE               |
| Isotype control            | R35-95       | BD Biosciences         | 553930             | 1:10-1:20       | PE               |
| Isotype control            | eB149/10H5   | eBioscience™           | 61-4031-80         | 1:50            | PE-eFluor®610    |
| Isotype control            | RTK4530      | BioLegend®             | 400607             | 1:50            | PE               |
| TruStain FcX™              | 93           | BioLegend®             | 101320             | 1:50            |                  |
